# Supplementary material for: Cellulosic Fiber: Mechanical Fibrillation-Morphology-Rheology Relationships
Source: Research Square preprint supplement (doi:10.21203/rs.3.rs-469007/v1), 2021-05-21
Supplement: Supplementary file 1 [file aa3f05fe5754f2ecc4152242.docx]

**Cellulosic fiber: mechanical fibrillation-morphology-rheology relationships**

Tianzhong Yuana,b, Jinsong Zenga,b,*, Bin Wanga,b,*, Zheng Chenga,b, and Kefu Chena,b

a State Key Laboratory of Pulp and Paper Engineering, Plant fiber research center, School of Light Industry and Engineering, South China University of Technology, Guangzhou 510640, China;

b Guangdong Plant Fiber High-Valued Cleaning Utilization Engineering Technology Research Center, South China University of Technology, Guangzhou 510640, China.

*Corresponding author

*Jinsong Zeng. E-mail: fezengjs@scut.edu.cn Tel: +86-15820223660

*Bin Wang. E-mail: febwang@scut.edu.cn Tel: +86-13560481802;

**
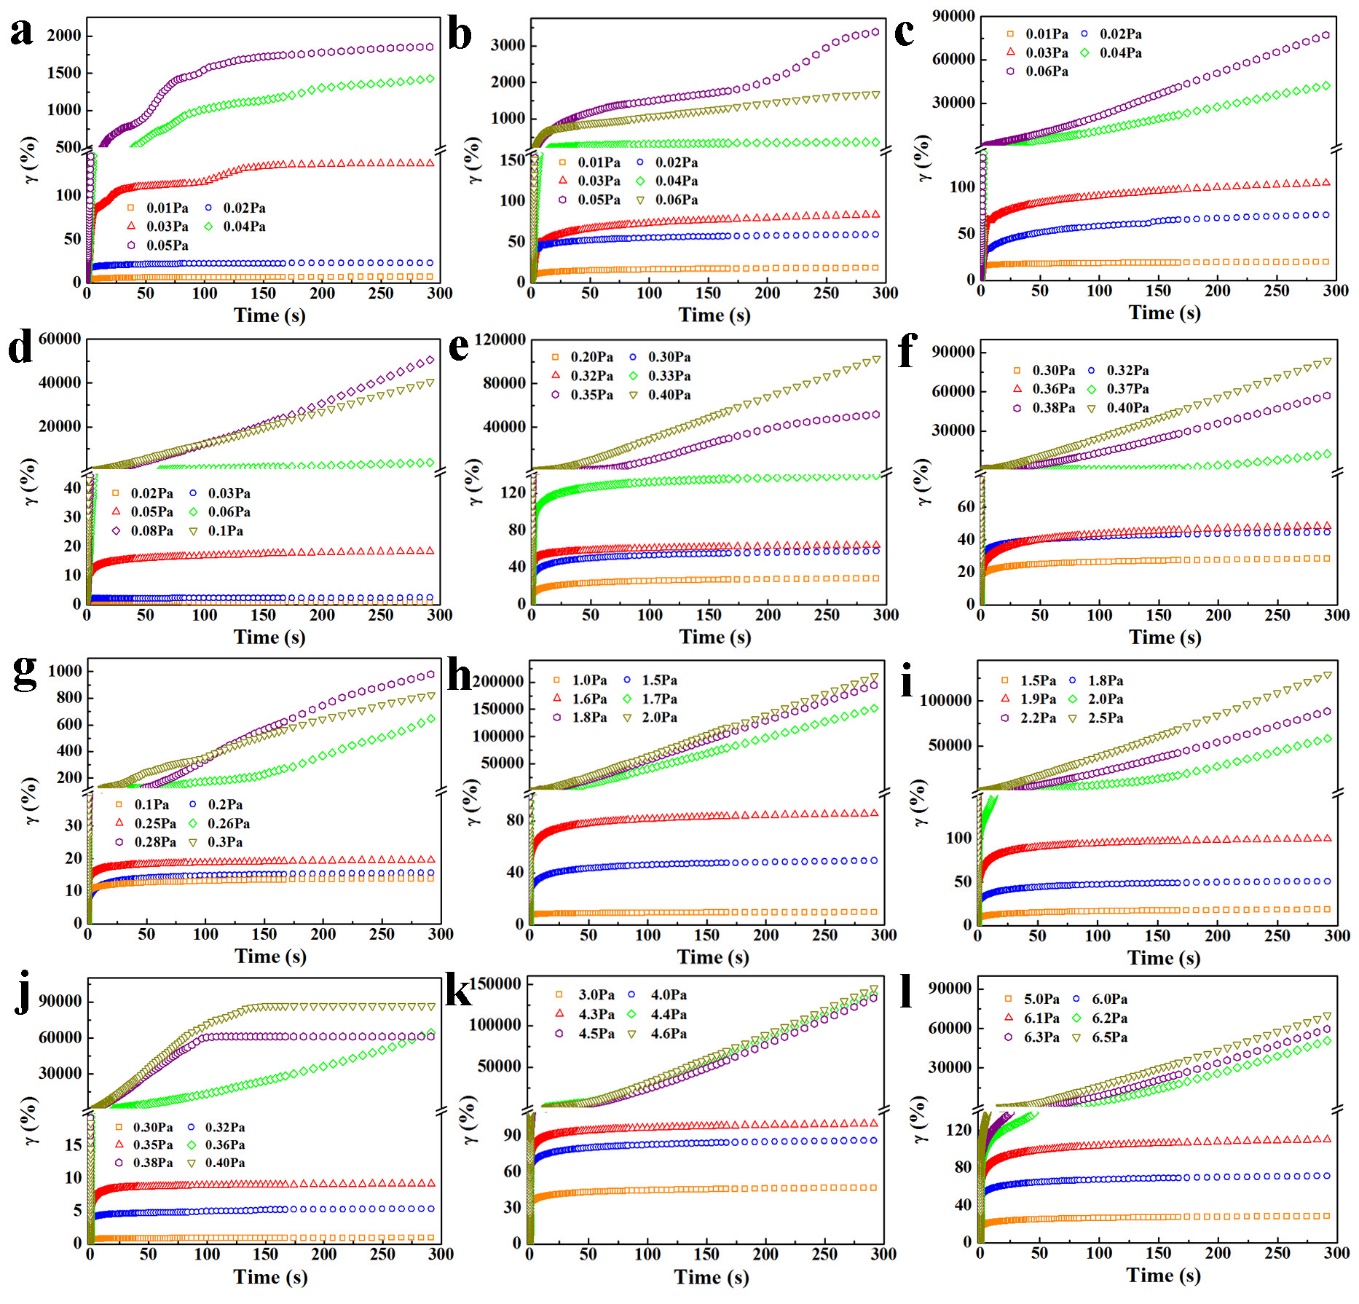
**

**Fig. S1** Viscoelastic response of NFC suspensions with different concentrations for shear stress values lower and higher than the yield stress, A10-0.25 (a), A10-0.50 (d), A10-0.75 (g), A10-1.0 (j), A20-0.25 (b), A20-0.50 (e), A20-0.75 (h), A20-1.0 (k), A40-0.25 (c), A40-0.50 (f), A40-0.75 (i), A40-1.0 (l),.
